# Supplementary material for: A new type of pH-responsive coordination polymer sphere as a vehicle for targeted anticancer drug delivery and sustained release
Source: Royal Society of Chemistry journal article supplement (doi:10.1039/c3tb00026e), 2013-01-01
Supplement: c3tb00026e.pdf [file c3tb00026e.pdf]

## Electronic Supporting Information

*for*

# A New Type of pH-Responsive Coordination Polymer Spheres as the Vehicle for Targeted Anticancer Drug Delivery and Sustained-Release

Peng Fei Gao,<sup>a</sup> Lin Ling Zheng,<sup>b</sup> Li Jiao Liang,<sup>b</sup> Xiao Xi Yang,<sup>a</sup> Yuan Fang Li<sup>b</sup>  
and Cheng Zhi Huang<sup>\*a,b</sup>

<sup>a</sup> Education Ministry Key Laboratory on Luminescence and Real-Time Analysis, College of Pharmaceutical Sciences, <sup>b</sup> Education Ministry Key Laboratory on Luminescence and Real-Time Analysis, College of Chemistry and Chemical Engineering, Southwest University, Chongqing 400715, China.

## Tables and Figures

|                             |      |      |      |
|-----------------------------|------|------|------|
| Ethanol content (%)         | 80   | 95   | 100  |
| Drug loading efficiency (%) | ~ 98 | < 60 | < 20 |

Table S1 DOX·HCl loading efficiencies in different ethanol content.

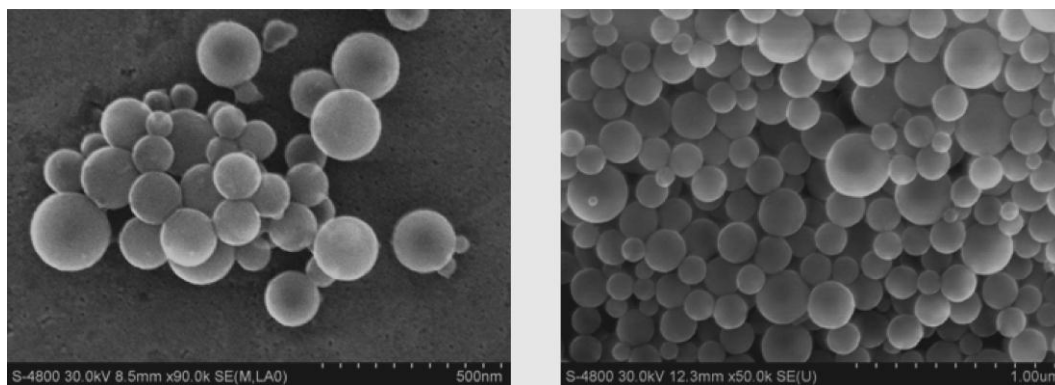

Figure S1 SEM (Scanning Electron Microscope) of Fe(bbi) spheres.

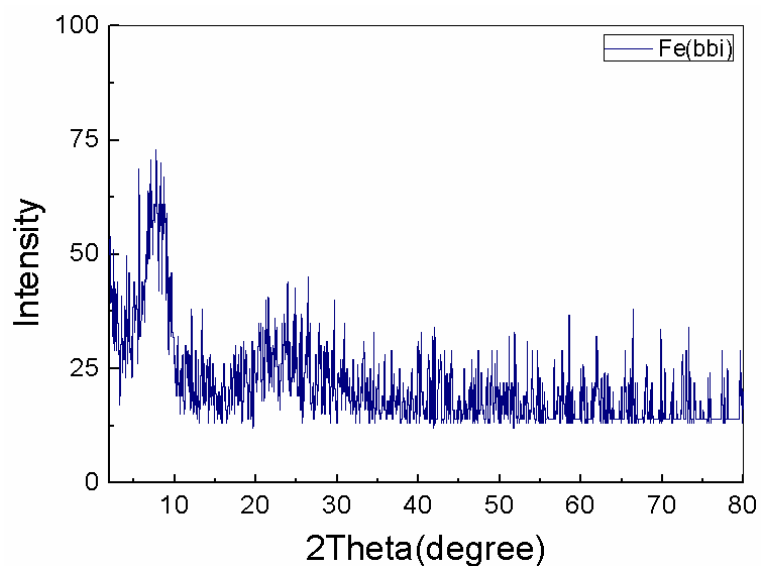

Figure S2 PXR D patterns of Fe(bbi) coordination polymer spheres.

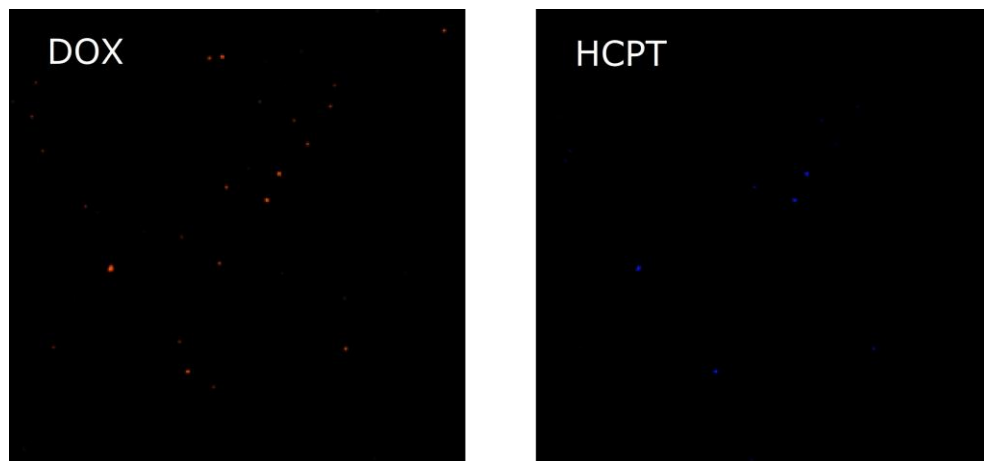

Figure S3 Fluorescence optical microscope images of coordination polymer spheres loading both DOX · HCl and HCPT collected at:  $\lambda_{exc}$ = 540 - 552 nm and  $\lambda_{em}$  > 590 nm for DOX;  $\lambda_{exc}$ = 359 - 371 nm and  $\lambda_{em}$  > 397 nm for CPT.

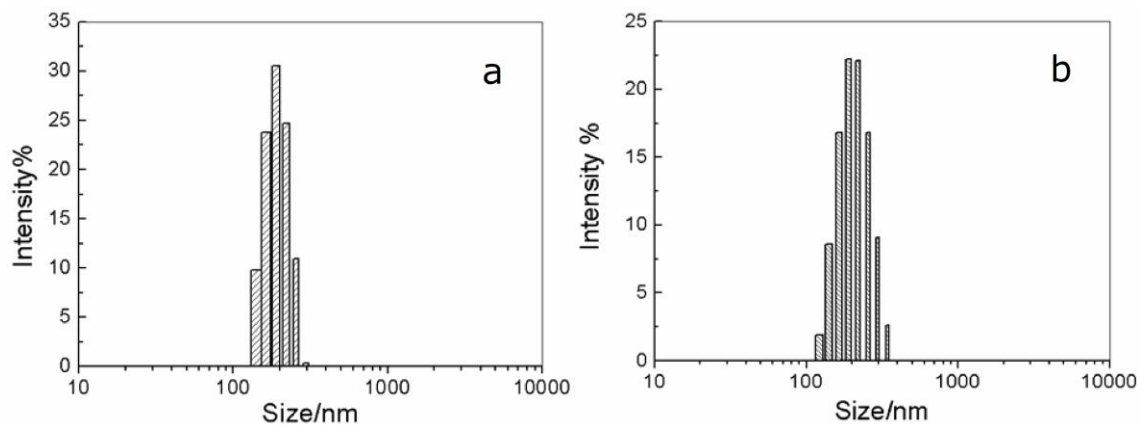

Figure S4 Size distribution profiles for (a) DOX/Fe(bbi) and (b) DOX/Fe(bbi)@SiO<sub>2</sub> spheres determined by DLS.

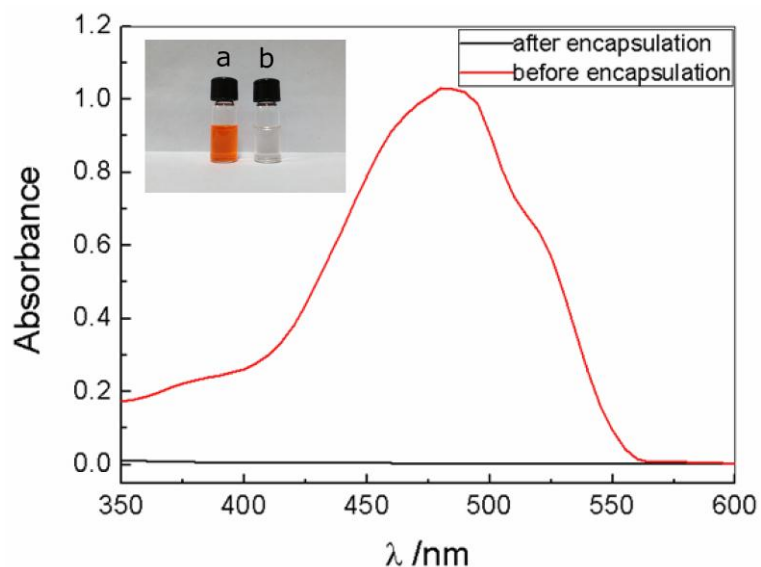

Figure S5 UV-visible spectra of the solution before and after encapsulation (solution alone, without spheres) which was diluted to 1/10. Embedded figure is the photograph of the reaction solution before and after DOX encapsulation.

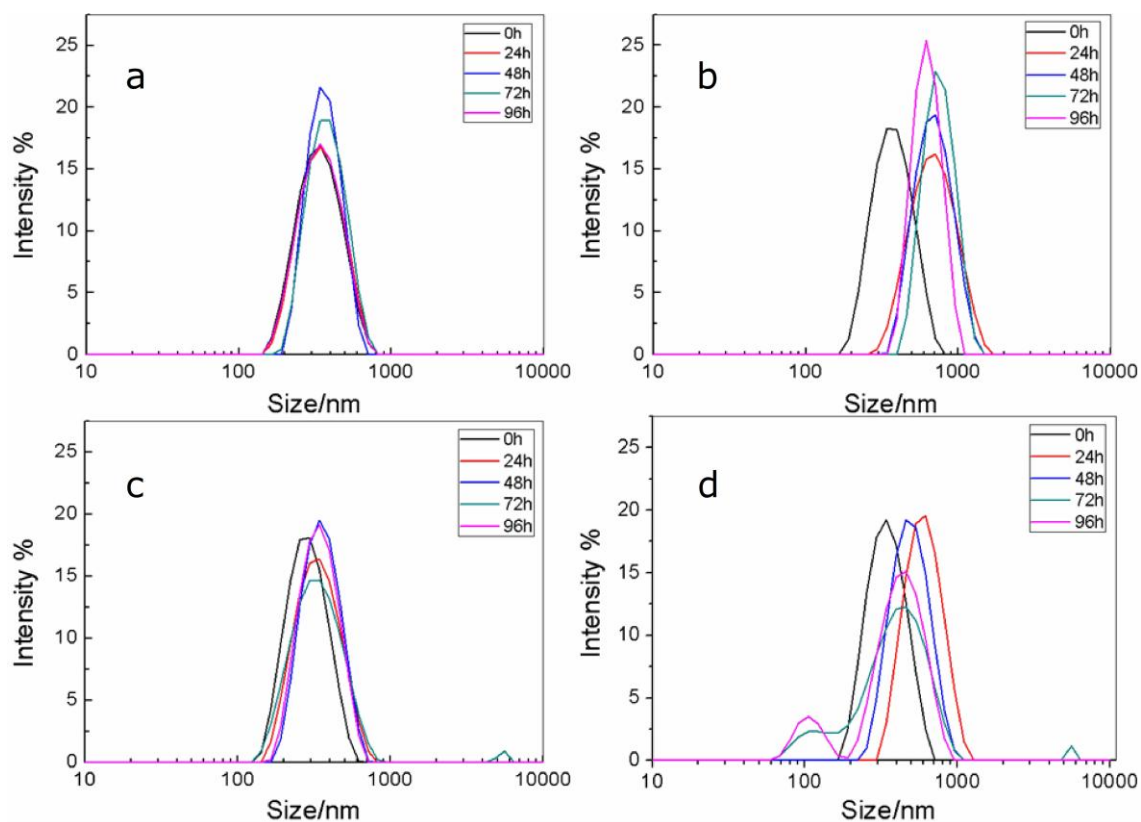

Figure S6 Size distribution profiles of different times for DOX/Fe(bbi) in (a) pH 7.4 PBS (b) pH 5.0 PBS and DOX/Fe(bbi)@SiO<sub>2</sub> in (a) pH 7.4 PBS (b) pH 5.0 PBS determined by DLS.

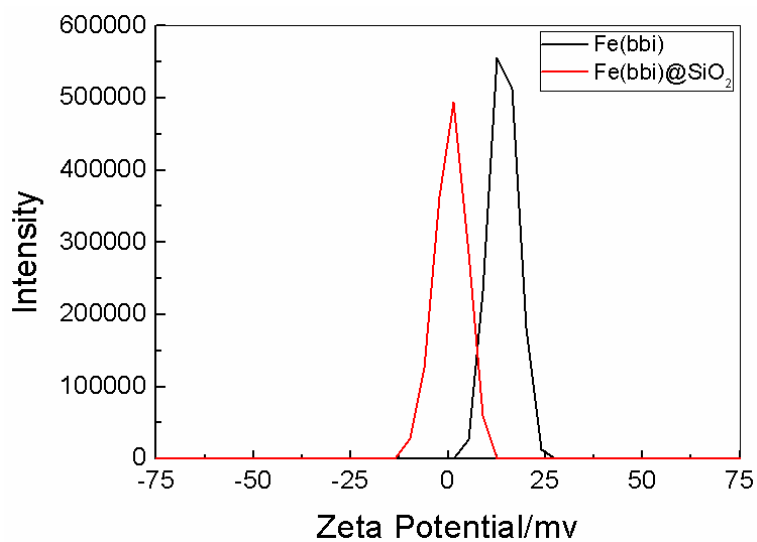

Figure S7 Zeta potential of DOX/Fe(bbi) and DOX/Fe(bbi)@SiO<sub>2</sub> in deionized water.

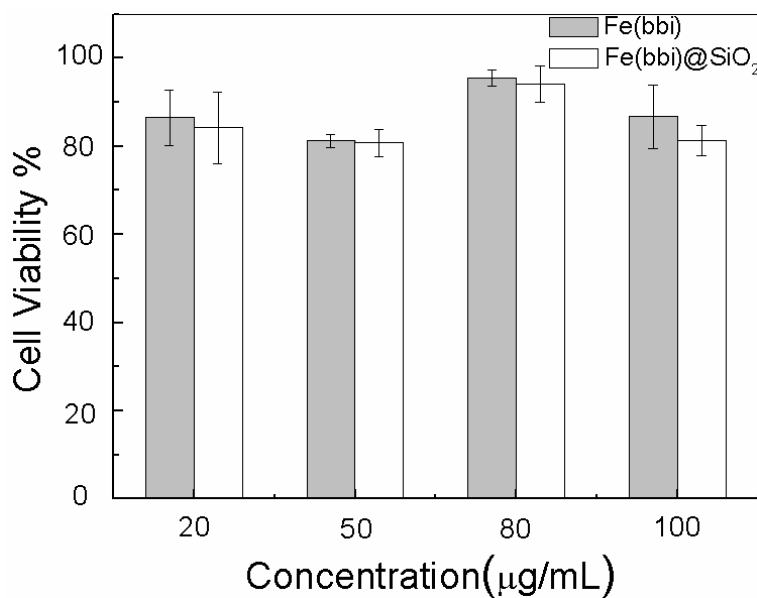

Figure S8 In vitro cytotoxicity of Fe(bbi) and Fe(bbi)@SiO<sub>2</sub> in 48h.
